# Supplementary material for: Diabetes Fact Sheet in Korea, 2016: An Appraisal of Current Status
Source: PubMed Central journal article supplement — Diabetes Metab J. 2018 Aug 9;42(5):415–24. doi: 10.4093/dmj.2018.0017 (PMC6202557; doi:10.4093/dmj.2018.0017), 2018-08-09
Supplement: dmj-42-415-s001.pdf [file dmj-42-415-s001.pdf]

**Supplementary Table 1.** Demographic and clinical characteristics of 10,595 subjects aged 30 years or older

| Variable               | Value         |
|------------------------|---------------|
| Male sex               | 4,574 (43.2)  |
| Age, yr                | 54.1 ± 14.5   |
| BMI, kg/m <sup>2</sup> | 23.9 ± 3.3    |
| Systolic BP, mm Hg     | 119.2 ± 17.1  |
| Diastolic BP, mm Hg    | 75.0 ± 10.6   |
| FPG, mg/dL             | 101.2 ± 23.4  |
| HbA1c, %               | 5.9 ± 0.8     |
| TC, mg/dL              | 190.3 ± 35.4  |
| HDL-C, mg/dL           | 50.6 ± 11.9   |
| Triglyceride, mg/dL    | 141.0 ± 109.5 |
| LDL-C, mg/dL           | 115.8 ± 34.3  |

Values are presented as number (%) or mean ± standard deviation.

BMI, body mass index; BP, blood pressure; FPG, fasting plasma glucose; HbA1c, glycosylated hemoglobin; TC, total cholesterol; HDL-C, high density lipoprotein cholesterol; LDL-C, low density lipoprotein cholesterol.
